# Supplementary material
Source: PubMed Central journal article supplement (PMC5882560)
Supplement: NIHMS939554-supplement-3.pdf [file NIHMS939554-supplement-3.pdf]

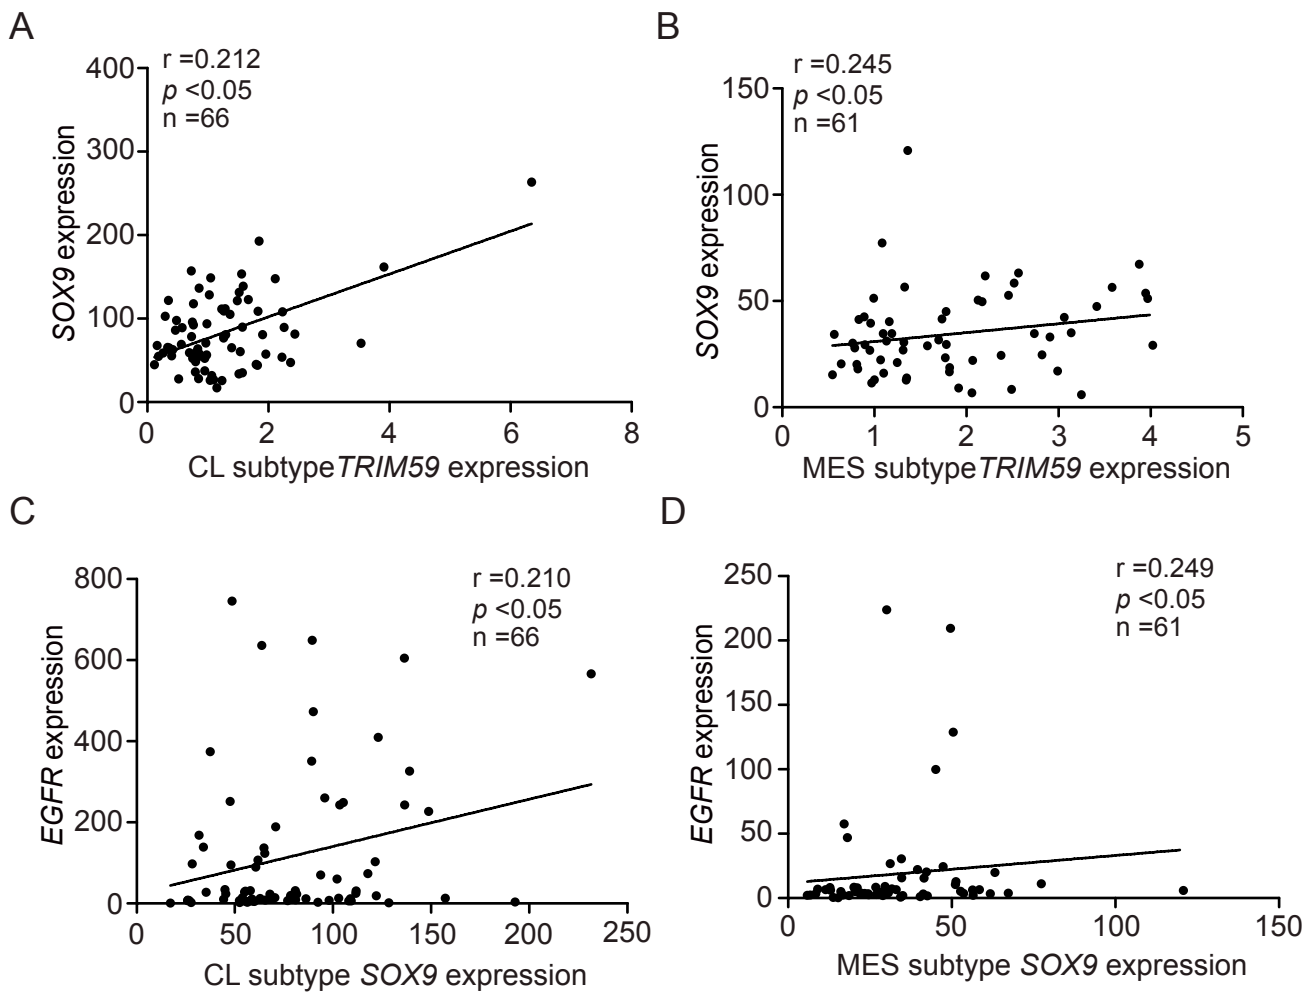

**Supplementary Figure 2.** Spearman's correlation analysis of expression of *TRIM59* and *SOX9* (A and B), and *SOX9* and *EGFR* (C and D) in human clinical classical (CL) and mesenchymal (MES) subtype glioma specimens using RNA-Seq analysis. Expression data of *TRIM59*, *SOX9* and *EGFR* mRNAs were downloaded from the CGGA dataset of Grade III tumors and GBM ([www.cgga.org.cn/](http://www.cgga.org.cn/)).
